# Supplementary material for: Time-Dependent Transcriptional Changes in Axenic Giardia duodenalis Trophozoites
Source: PLoS Negl Trop Dis. 2015 Dec 4;9(12):e0004261. doi: 10.1371/journal.pntd.0004261 (PMC4670223; doi:10.1371/journal.pntd.0004261)
Supplement: S4 Table — (XLSX) [file pntd.0004261.s004.xlsx]

## Sheet: S4 Table
S4 Table. KEGG BRITE terms that are enriched within large differentially transcribed gene groups.
DTG group	KEGG BRITE term	Description	DTG group prevalence	Background prevalence	p value	Contributing genes
48h&60h>96h	br:ko04121	Ubiquitin-conjugating enzymes (E2)	4	17	0.0228556	GL50803_3978; GL50803_24068; GL50803_6524; GL50803_8638
48h&60h>96h	br:ko01009	Protein phosphatase-1	12	107	0.0491097	GL50803_10893; GL50803_16042; GL50803_6680; GL50803_12095; GL50803_17069; GL50803_4977; GL50803_16279; GL50803_11311; GL50803_14568; GL50803_8445; GL50803_3957; GL50803_4912
48h&60h>96h	br:ko01001	NEK family	10	65	0.0095624	GL50803_10893; GL50803_3957; GL50803_6680; GL50803_17069; GL50803_4977; GL50803_16279; GL50803_11311; GL50803_12095; GL50803_8445; GL50803_4912
48h&60h>96h	br:ko01001	NEK; NIMA (never in mitosis gene a)-related kinase [EC:2.7.11.1]	10	65	0.0095624	GL50803_10893; GL50803_3957; GL50803_6680; GL50803_17069; GL50803_4977; GL50803_16279; GL50803_11311; GL50803_12095; GL50803_8445; GL50803_4912
48h&60h>96h	br:ko03051	Core particles (20S proteasome)	4	18	0.0278981	GL50803_13127; GL50803_12949; GL50803_13756; GL50803_3209
48h&60h>96h	br:ko01002	Threonine Peptidases	4	18	0.0278981	GL50803_13127; GL50803_12949; GL50803_13756; GL50803_3209
48h&60h>96h	br:ko01002	Family T1: proteasome family	4	18	0.0278981	GL50803_13127; GL50803_12949; GL50803_13756; GL50803_3209
48h&60h>96h	br:ko00002	Carbohydrate and lipid metabolism	11	80	0.0153127	GL50803_29307; GL50803_92729; GL50803_14546; GL50803_13962; GL50803_14759; GL50803_16558; GL50803_9115; GL50803_6633; GL50803_134377; GL50803_134378; GL50803_88581
48h&60h>96h	br:ko00002	Central carbohydrate metabolism	4	21	0.046727	GL50803_134378; GL50803_9115; GL50803_14759; GL50803_134377
48h&60h>96h	br:ko00001	Cell communication	4	16	0.0184122	GL50803_21444; GL50803_13584; GL50803_16343; GL50803_86761
48h&60h>96h	br:ko00001	04530 Tight junction [PATH:ko04530]	4	16	0.0184122	GL50803_13584; GL50803_21444; GL50803_16343; GL50803_86761
48h&60h>96h	br:ko00001	04141 Protein processing in endoplasmic reticulum [PATH:ko04141]	8	56	0.0298438	GL50803_7569; GL50803_14877; GL50803_15089; GL50803_8638; GL50803_15126; GL50803_15398; GL50803_6524; GL50803_2509
48h&60h>96h	br:ko04031	GTP-binding proteins	5	27	0.0301761	GL50803_8140; GL50803_9558; GL50803_15567; GL50803_13109; GL50803_7569
48h&60h>96h	br:ko04031	Small (Monomeric) G-proteins	5	27	0.0301761	GL50803_8140; GL50803_9558; GL50803_15567; GL50803_13109; GL50803_7569
48h&60h>96h	br:ko01000	3.4.25 Threonine endopeptidases	4	18	0.0278981	GL50803_13127; GL50803_12949; GL50803_13756; GL50803_3209
48h&60h>96h	br:ko01000	3.1.3 Phosphoric-monoester hydrolases	12	58	0.000307178	GL50803_14905; GL50803_31309; GL50803_5010; GL50803_4063; GL50803_2053; GL50803_14546; GL50803_19388; GL50803_11599; GL50803_14311; GL50803_14568; GL50803_15214; GL50803_13524
48h&60h>96h	br:ko03036	Centromeric chromatin formation proteins	9	47	0.00313419	GL50803_19388; GL50803_17472; GL50803_100955; GL50803_5010; GL50803_13651; GL50803_16945; GL50803_15214; GL50803_21662; GL50803_2509
48h&60h>96h	br:ko03036	Kinases and associated factors	10	70	0.015884	GL50803_10893; GL50803_3957; GL50803_6680; GL50803_17069; GL50803_4977; GL50803_16279; GL50803_11311; GL50803_12095; GL50803_8445; GL50803_4912
96h>48h&60h	br:ko00002	Pathway module	10	159	0.0234485	GL50803_13672; GL50803_39432; GL50803_23420; GL50803_16552; GL50803_14374; GL50803_114609; GL50803_17063; GL50803_92618; GL50803_36751; GL50803_89440
96h>48h&60h	br:ko00002	Energy metabolism	4	33	0.0179527	GL50803_17063; GL50803_39432; GL50803_89440; GL50803_114609
96h>48h&60h	br:ko00002	Carbon fixation	4	31	0.0144657	GL50803_17063; GL50803_39432; GL50803_89440; GL50803_114609
96h>48h&60h	br:ko00001	Neurodegenerative diseases	3	19	0.0196818	GL50803_40496; GL50803_14713; GL50803_111950
96h>48h&60h	br:ko00001	05016 Huntington's disease [PATH:ko05016]	3	17	0.0144412	GL50803_40496; GL50803_14713; GL50803_111950
96h>48h&60h	br:ko00001	Cellular Processes	10	138	0.00922565	GL50803_112076; GL50803_38462; GL50803_17478; GL50803_19208; GL50803_2527; GL50803_15564; GL50803_93736; GL50803_100906; GL50803_92602; GL50803_32436
96h>48h&60h	br:ko00001	Transport and catabolism	6	85	0.0466675	GL50803_15564; GL50803_93736; GL50803_38462; GL50803_17478; GL50803_100906; GL50803_32436
96h>48h&60h	br:ko00001	04145 Phagosome [PATH:ko04145]	4	19	0.00236327	GL50803_17478; GL50803_93736; GL50803_100906; GL50803_38462
96h>48h&60h	br:ko04147	Proteins found in most exosomes	4	43	0.042905	GL50803_17478; GL50803_100906; GL50803_31706; GL50803_38462
96h>48h&60h	br:ko01000	1. Oxidoreductases	5	63	0.044308	GL50803_17063; GL50803_39432; GL50803_31706; GL50803_89440; GL50803_114609
96h>48h&60h	br:ko04812	Cytoskeleton proteins	11	118	0.000828113	GL50803_32233; GL50803_40496; GL50803_6735; GL50803_38462; GL50803_17478; GL50803_2527; GL50803_111950; GL50803_112846; GL50803_93736; GL50803_100906; GL50803_92602
96h>48h&60h	br:ko04812	Eukaryotic cytoskeleton proteins	11	118	0.000828113	GL50803_32233; GL50803_40496; GL50803_6735; GL50803_38462; GL50803_17478; GL50803_2527; GL50803_111950; GL50803_112846; GL50803_93736; GL50803_100906; GL50803_92602
96h>48h&60h	br:ko04812	Microtubules	9	97	0.00264666	GL50803_32233; GL50803_40496; GL50803_38462; GL50803_17478; GL50803_100906; GL50803_6735; GL50803_112846; GL50803_93736; GL50803_111950
96h>48h&60h	br:ko04812	Tubulin-binding proteins	9	86	0.00112273	GL50803_32233; GL50803_40496; GL50803_38462; GL50803_17478; GL50803_100906; GL50803_111950; GL50803_112846; GL50803_93736; GL50803_6735
96h>48h&60h	br:ko03036	Centromeric chromatin formation proteins	5	47	0.0141876	GL50803_17478; GL50803_93736; GL50803_100906; GL50803_90540; GL50803_38462
96h>48h&60h	br:ko03036	SAC (spindle assembly checkpoint) factors	4	17	0.00152144	GL50803_17478; GL50803_93736; GL50803_100906; GL50803_38462
